# Supplementary material
Source: PubMed Central journal article supplement (PMC2683707)
Supplement: emboj200959s1.pdf [file emboj200959s1.pdf]

## Supplementary Materials

### Contents

|                        |       |   |
|------------------------|-------|---|
| Supplementary Methods  | ..... | 2 |
| Supplementary Table S2 | ..... | 4 |
| Supplementary Table S3 | ..... | 5 |
| Supplementary Figures  | ..... | 7 |

(Supplementary Table S1 is shown in a separate file.)

## Supplementary Methods

### **Immunoprecipitation and Microarray Analysis of Methylated DNA.**

The genomic DNA was sonicated to produce random fragments ranging in size from 100 to 1,000 bp. Immunoprecipitation (IP) using anti-methylcytosine antibody was performed as described by Weber et al (2005). DNA samples were sent to NimbleGen for labeling and hybridization. Two independent experiments (experiments A and B) were performed using different plants and different probe amplification methods. In the experiment A, the immunoprecipitated DNA was amplified following the NimbleGen's instruction using GenomePlex Complete Whole Genome Amplification Kit (SIGMA, WGA2). In the experiment B, the probe was amplified by linear amplification method described by Liu et al. (2003). Although the amplification methods are different, response to the *ibm1* mutation in each gene gave consistent results (Supplementary Fig. S1-S13). The analyses in Figure 1, 3, 4, 5A, 5C, and 5D are based on results of experiment A.

**Data Normalization.** The Arabidopsis genome is covered by three 385K chips of NimbleGen. The first chip covers entire chromosome 1 and part of chromosome 2. The second chip covers entire chromosome 3 and parts of chromosome 2 and 4. The third chip covers entire chromosome 5 and part of chromosome 4. In order to integrate the results from three chips, the IP/input signal values of each chip was normalized using average of one chromosome for each chip: chromosome 1, 3, and 5 for chip 1, 2, and 3, respectively. Values for part of chromosomes were not used, in order to avoid bias caused by the different proportion of methylated pericentromeric regions and arm regions in the part of chromosome. As methylation level of transposons are similar between *ibm1* and wild type (Fig. 1C, 2N-2P), we used value of y-intercept of Figure 1C for comparison between *ibm1* and wild type.

**Relationship between DNA Methylation and Gene Expression.** Data used in the analyses of gene expression levels and tissue specificities were from a previous study analyzing the genome-wide expression pattern in various developmental stages and tissues of Arabidopsis (Schmid et al. 2005). For Fig.

4A and 4B, sum of expression in all of stages and tissues was used. For tissue specificity (Fig. 4C and 4D), entropy levels of each gene were calculated as described by Zhang et al. (2006). For Fig. 5C, 5D, and S15, expression profiles in wild-type leaf in our microarray analysis (data not shown) were used.

### **References for Supplementary Methods**

Liu CL, Schreiber, SL and Bernstein BE (2003) Development and validation of a T7 based linear amplification for genomic DNA. *BMC Genomics* **4**: 19

Schmid M et al. (2005) A gene expression map of Arabidopsis thaliana development. *Nat. Genet.* **37**: 501

Weber M et al. (2005) Chromosome-wide and promoter-specific analyses identify sites of differential DNA methylation in normal and transformed human cells. *Nat. Genet.* **37**: 853-862

Zhang, X. et al. (2006) Genome-wide high-resolution mapping and functional analysis of DNA methylation in Arabidopsis. *Cell* **126**, 1189-1201

## Supplementary Table S2

Genes responding to *ibm1* were not necessarily located near transposons.

|                    | Class I        | Class II         | Class III        | Total  |
|--------------------|----------------|------------------|------------------|--------|
| Total              | 651<br>(0.024) | 2,461<br>(0.091) | 23,931<br>(0.88) | 27,043 |
| Transposon-flanked | 156<br>(0.018) | 841<br>(0.097)   | 7,813<br>(0.90)  | 8,710  |

Genes flanked by transposons were counted for each Class of genes. We defined the “transposon-flanked” genes as those flanked by transposons within 1,000 bp, and that do not overlap with transposons more than 1,000 bp. Proportion of each Class within the total and transposon-flanked genes are shown in the parenthesis. Class I genes were not enriched in the transposon-flanked population.

Supplementary Table 3

Primer sequences and restriction enzymes used for the bisulfite sequencing.

| Target                     | Primers       | Restriction enzyme      | Sequence (5' to 3')            |
|----------------------------|---------------|-------------------------|--------------------------------|
| AT2G16920                  | AT2G16920-F1  | <i>HindIII</i>          | TGAGAATGATTYTGAGGAGAA          |
|                            | AT2G16920-R1  |                         | CCCCRACTATTACTRCCCTCA          |
|                            | AT2G16920-F2  | <i>HindIII</i>          | AAGAAGGTTGATYAAGAYTGAAAA       |
|                            | AT2G16920-R2  |                         | TTCCRACCTRCTTATCATACCC         |
|                            | AT2G16920-F3  | <i>EcoT14I</i>          | GGAYAGGYAGGGAAATGAAGT          |
|                            | AT2G16920-R3  |                         | CCCAAACATRACCAACCAA            |
| AT4G00450                  | AT4G00450-F1  | <i>EcoRV</i>            | TTGTAATTGAGGTTYTGAAYYTTTGG     |
|                            | AT4G00450-R1  |                         | TCACTTTTATAAACCAARTARCTCTCAATA |
|                            | AT4G00450-F2  | <i>EcoRV</i>            | GGAGGAGAYAAAGAAAAGATGGA        |
|                            | AT4G00450-R2  |                         | CACCATATACCACCATTTAAAAT        |
|                            | AT4G00450-F3  | <i>EcoRV</i>            | AATGGAYAAAAGATGTTATTGAATATTTG  |
|                            | AT4G00450-R3  |                         | AACAATACTCTCTAAACACCATACACAAT  |
| AT4G16310                  | AT4G16310-F1  | <i>SspI</i>             | GAAGAATTTAGTTATGTGTGATTGTGG    |
|                            | AT4G16310-R1  |                         | ACATCTTAAARTACACCCTTCTTATAA    |
|                            | AT4G16310-F2  | <i>HindIII</i>          | AAGGAAATTGAAATTGGTAGAG         |
|                            | AT4G16310-R2  |                         | AAACCARCACTCATTCTCTTTTC        |
|                            | AT4G16310-F3  | <i>HindIII</i>          | TGTTATATTTGTGTGGTTYGAT         |
|                            | AT4G16310-R3  |                         | CTATAACTTTCTTCTCATCTATAACCTC   |
| AT4G31440                  | AT4G31440-F1  | <i>NdeI</i>             | GTTTTTGGGAGATGAGATTG           |
|                            | AT4G31440-R1  |                         | CAAAARRACCCAAAACCTTTCC         |
|                            | AT4G31440-F2  | <i>NdeI</i>             | GGTGYTTGGGAAAGAAGATGG          |
|                            | AT4G31440-R2  |                         | CACTCCRCTRAAACCCCTCC           |
|                            | AT4G31440-F3  | <i>NdeI</i>             | TGAGGAAGAGGATGGAGAATATTG       |
|                            | AT4G31440-R3  |                         | CCAAATTTCTTTTRATCTTACAACAACAC  |
| At5G35210<br>Top-Strand    | At5G35210-tF1 | <i>EcoT14I</i>          | AGATTTGGTYATTGGGTTAGGTTT       |
|                            | At5G35210-tR1 |                         | ATCAAATCCAATTTCARATTCTTC       |
|                            | At5G35210-tF2 | <i>DraI</i>             | ATTGGGATGAAATTGAAGATT          |
|                            | At5G35210-tR2 |                         | CTAATTCCAACAAATRCAAAACAAATT    |
|                            | At5G35210-tF3 | <i>DraI</i>             | GAGGAGYTGAYAGTTTGAATGGAT       |
|                            | At5G35210-tR3 |                         | CCAATTTTTTCCCCTRTATTCCACAT     |
| At5G35210<br>Bottom-Strand | At5G35210-bF1 | <i>NdeI&amp;HindIII</i> | TTTGTGAATGATTATTGTATGTGTTGGG   |
|                            | At5G35210-bR1 |                         | TTTTCRTTRCCTCCATTCCATACATAATTT |
|                            | At5G35210-bF2 | <i>DraI</i>             | AGGGGAATAGATTGAAAGAT           |
|                            | At5G35210-bR2 |                         | AAATARAATACTACTCRTTACCCATT     |
|                            | At5G35210-bF3 | <i>EcoT14I</i>          | GGTTTTAGYGAATYTGAGGTTGGA       |
|                            | At5G35210-bR3 |                         | CTTTATATCTRCCCATTTTAACTCAAT    |

|                            |                      |                               |                                          |
|----------------------------|----------------------|-------------------------------|------------------------------------------|
| At5G01580<br>Top-Strand    | At5G01580-tF1        | <i>Ndel</i> & <i>Hind</i> III | TTGTTTAATGAGAYAYAAGAATAAAG               |
|                            | At5G01580-tR1        |                               | CTCAATCCAACCATTCTAAACAATC                |
|                            | At5G01580-tF2        | <i>Ndel</i> & <i>Hind</i> III | TTTGAYTGTTAATGTGAATTATATGTG              |
|                            | At5G01580-tR2        |                               | TTCTRITTCACCAAARACATATAAAT               |
|                            | At5G01580-tF3        | <i>Ndel</i> & <i>Hind</i> III | TAGATTTGTAYYATGGGTGGTTGTGAATAA           |
|                            | At5G01580-tR3        |                               | TAACCTTTARCCTCCAAAATCTTCA                |
| At5G01580<br>Bottom-Strand | At5G01580-bF1        | <i>Dra</i> I                  | ATGTAATGGTATTTGGGATATTATAAA              |
|                            | At5G01580-bR1        |                               | CCCAAGTTTRCTATTCCAATCACTAA               |
|                            | At5G01580-bF2        | <i>Ndel</i> & <i>Hind</i> III | GTGTAGAAYGAATTGGAGAGGAG                  |
|                            | At5G01580-bR2        |                               | AACATTARTTAECTTATACARCCACAACA            |
|                            | At5G01580-bF3        | <i>Ndel</i> & <i>Hind</i> III | TTGAAAGTTATTAGYTAAATTTATAGGA             |
|                            | At5G01580-bR3        |                               | CTTAATCTCATCCATTRATCTCCA                 |
| AT3G16950<br>Top-Strand    | AT3G16950-tF1        | <i>Ndel</i>                   | AAAAGGTAAATATGGGAAGGA                    |
|                            | AT3G16950-tR1        |                               | CTTCTTRRATTTATCAAAACCCTCT                |
|                            | AT3G16950-tF2        | <i>Ndel</i>                   | GTAATAGTAGAAAATAAGATTTAAGG               |
|                            | AT3G16950-tR2        |                               | CACAAATCTCCCAATTCA                       |
|                            | AT3G16950-tF3        | <i>Ndel</i>                   | TAAGGATAYTTTGGAGGTAA                     |
|                            | AT3G16950-tR3        |                               | CCCCTTCCATCRATCACAC                      |
| AT3G16950<br>Bottom-Strand | AT3G16950-bF1        | <i>Eco</i> RV                 | TAAAAGGTGGGATTTAGTGT                     |
|                            | AT3G16950-bR1        |                               | CAAATACTRCTTCTCTTCTCTATACA               |
|                            | AT3G16950-bF2        | <i>Ndel</i> & <i>Hind</i> III | TGAATAAGAATAGATTTAAGTTTAA                |
|                            | AT3G16950-bR2        |                               | CAATTARCAATRTTCTCCAATTTTCTA              |
|                            | AT3G16950-bF3        | <i>Dra</i> I                  | AATAYAGGAAGAGAYYAAAYAAGAA                |
|                            | AT3G16950-bR3        |                               | CTACCAAAAACRAAACAATCT                    |
| AT3G21215                  | AT3G21215-F1         | <i>Eco</i> T14I               | GGTATTGTTGGGGATTYAAATGYTTATGAT           |
|                            | AT3G21215-R1         |                               | ATCAAACAATCARAACTTTARCAAATTCA            |
|                            | AT3G21215-F2         | <i>Ndel</i>                   | GGTTGTGTTGTGGAAYAATAGTTGTT               |
|                            | AT3G21215-R2         |                               | TATRCCTTCTTRTCTCARAATCTTCAT              |
|                            | AT3G21215-F3         | <i>Eco</i> T14I               | GAAGAAGAATTGAGGAGYYTGTGAGTG              |
|                            | AT3G21215-R3         |                               | CCTTCCTTCTCTTCCCATATRRATTCTTT            |
| AT4G35270                  | AT4G35270-F1         | <i>Ndel</i>                   | TGYTTYAAGGGGAAGGYATTGTAGGAA              |
|                            | AT4G35270-R1         |                               | TTCTCTRCAAAAACAACCTTCTCTCTAAC            |
|                            | AT4G35270-F2         | <i>Ndel</i>                   | GTTAGAGAGGAAGTTGTTTTGYAGAGAA             |
|                            | AT4G35270-R2         |                               | TCTTTTCTRTTTTTRTTCTTCTCTCTCAC            |
| AtMu1                      | ATMU1-bF1            | <i>Eco</i> RV                 | GTGTTTATGATTATATAATTGTGTTATAAT           |
|                            | ATMU1-bR1            |                               | CCTTCTTTTCATTCARATTTAATTTT               |
| Ta3                        | JP1615 <sup>*1</sup> | <i>Dra</i> I                  | GGTTTAATGTTGGTTTAGTGATATTYGGTTAGT        |
|                            | JP1616 <sup>*1</sup> |                               | AATCAAAAAACRAATAAACCTCRCTCTRATACCACTTATT |
| CACTA2                     | CAC2-bsF2            | <i>Dra</i> I                  | CATATAAACCCCAAAATCAAATC                  |
|                            | CAC2-bsR2            |                               | ATGGAAAAGGAGAAGGAGGTAT                   |

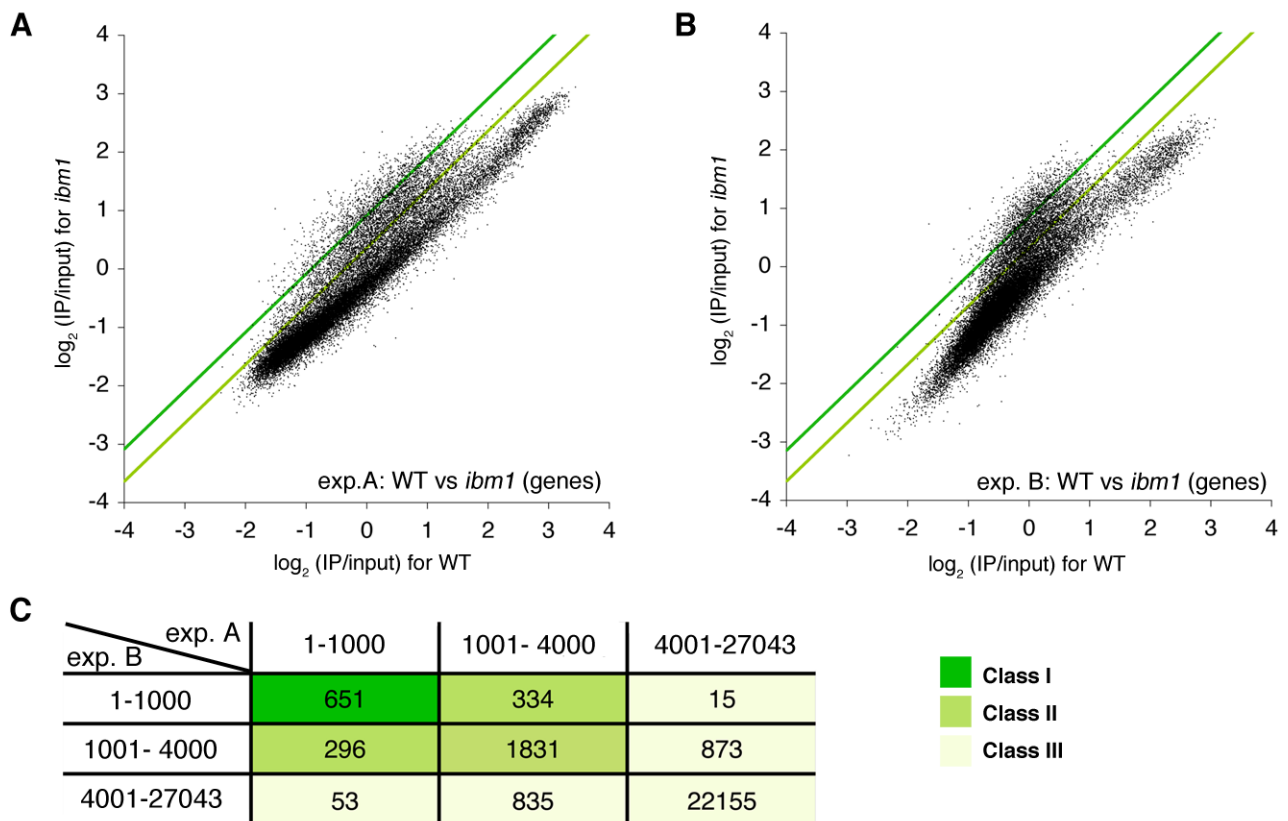

**Supplementary Figure S1** Genes showing strong response to the *ibm1* mutation. (A, B) Each gene was compared between *ibm1* and wild type for the average of methylation signal of every probes covered by that gene. Experiment A (panel A) and B (panel B) were independent experiments using different *ibm1* and wild type plants and different probe amplification methods (See Supplementary Methods). (C) As at least 4,000 genes show significant changes, they were compared between experiments A and B. Among the 27,043 genes, we selected 3,112 genes (651 species of Class I genes, and 2,461 Class II genes) that reproducibly show most dense increase in methylation signal induced by the *ibm1* mutation.

### Legend for Supplementary Figure S2-S13.

Full results for DNA methylation status in the 12 representative loci. Results are shown in the format of Figure 2 in the main text. Tiling array results of both experiments A and B are shown. In the Supplementary Figure S2-S4, bisulfite sequencing results of both sense and antisense strands are shown.

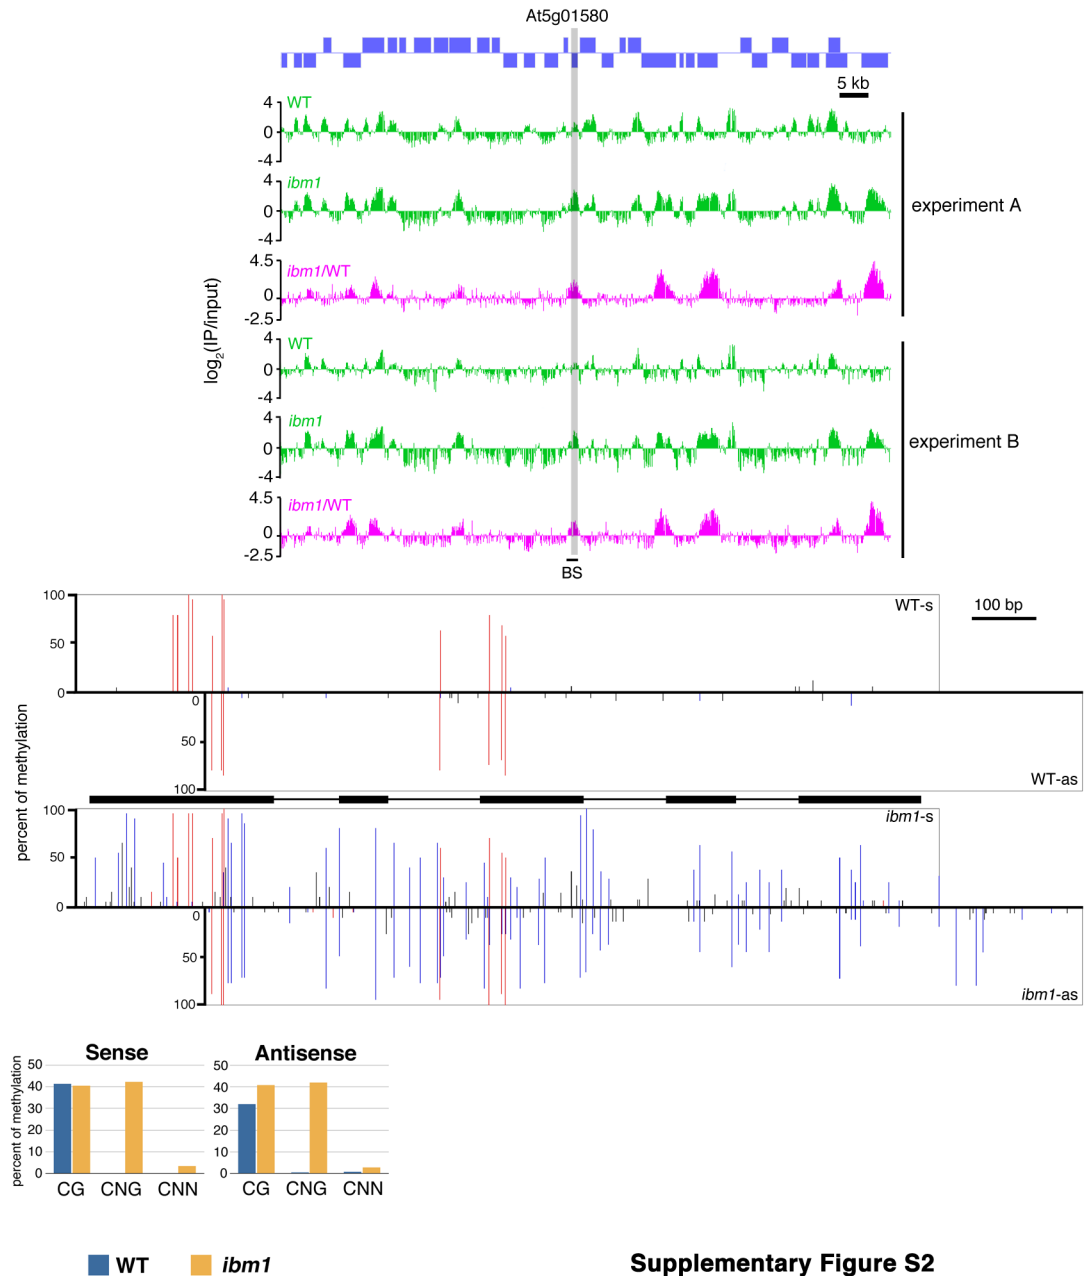

Supplementary Figure S2



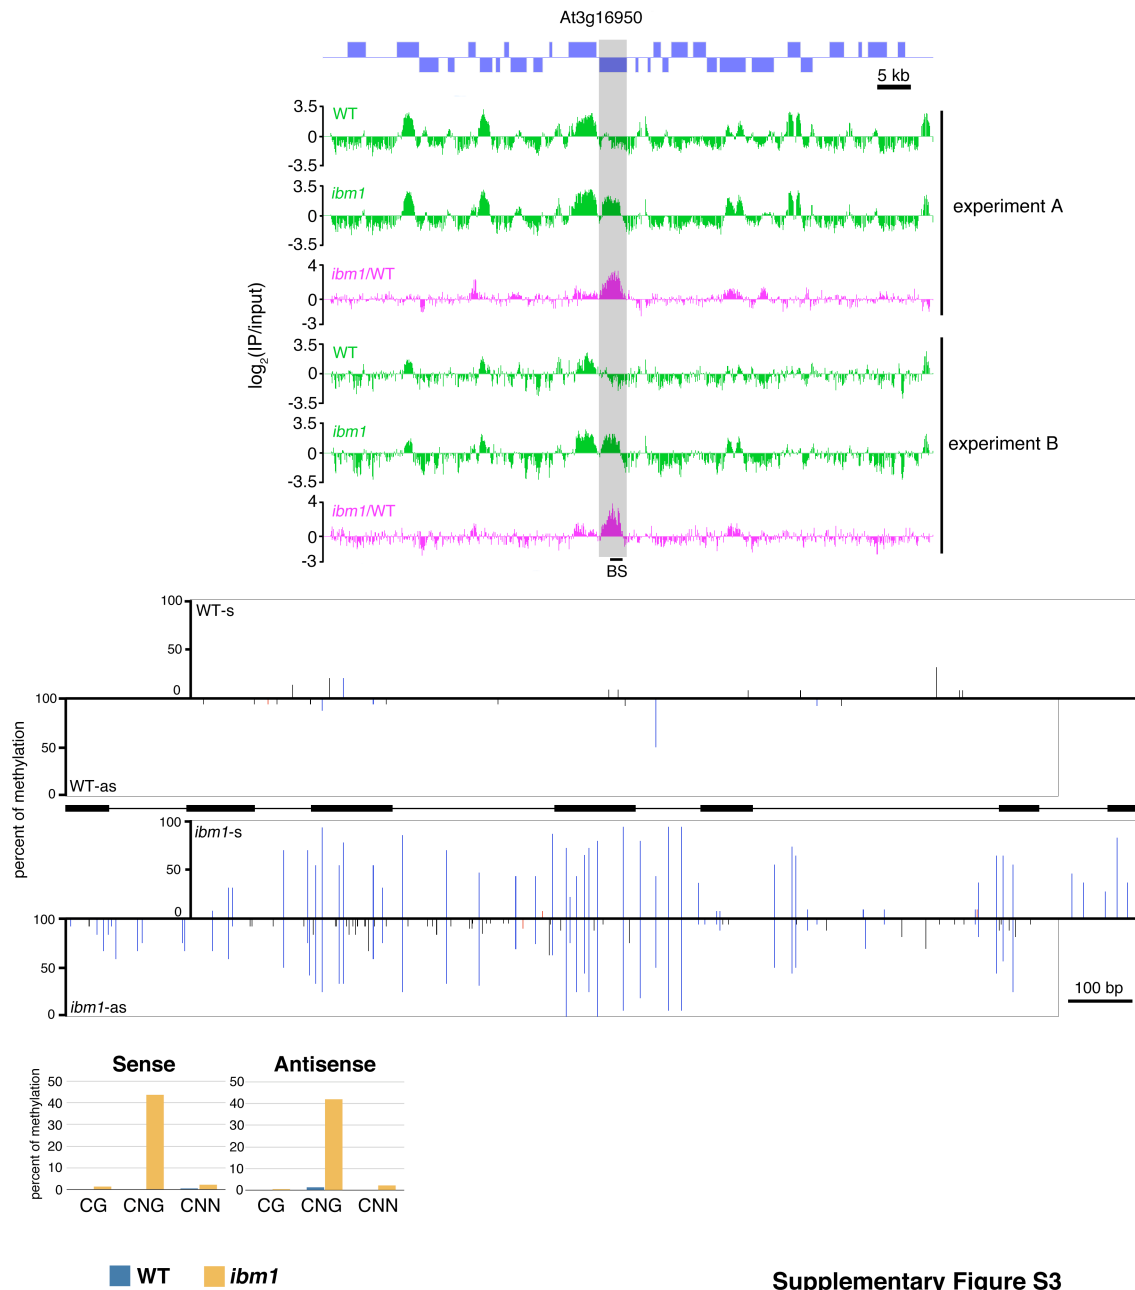

Supplementary Figure S3

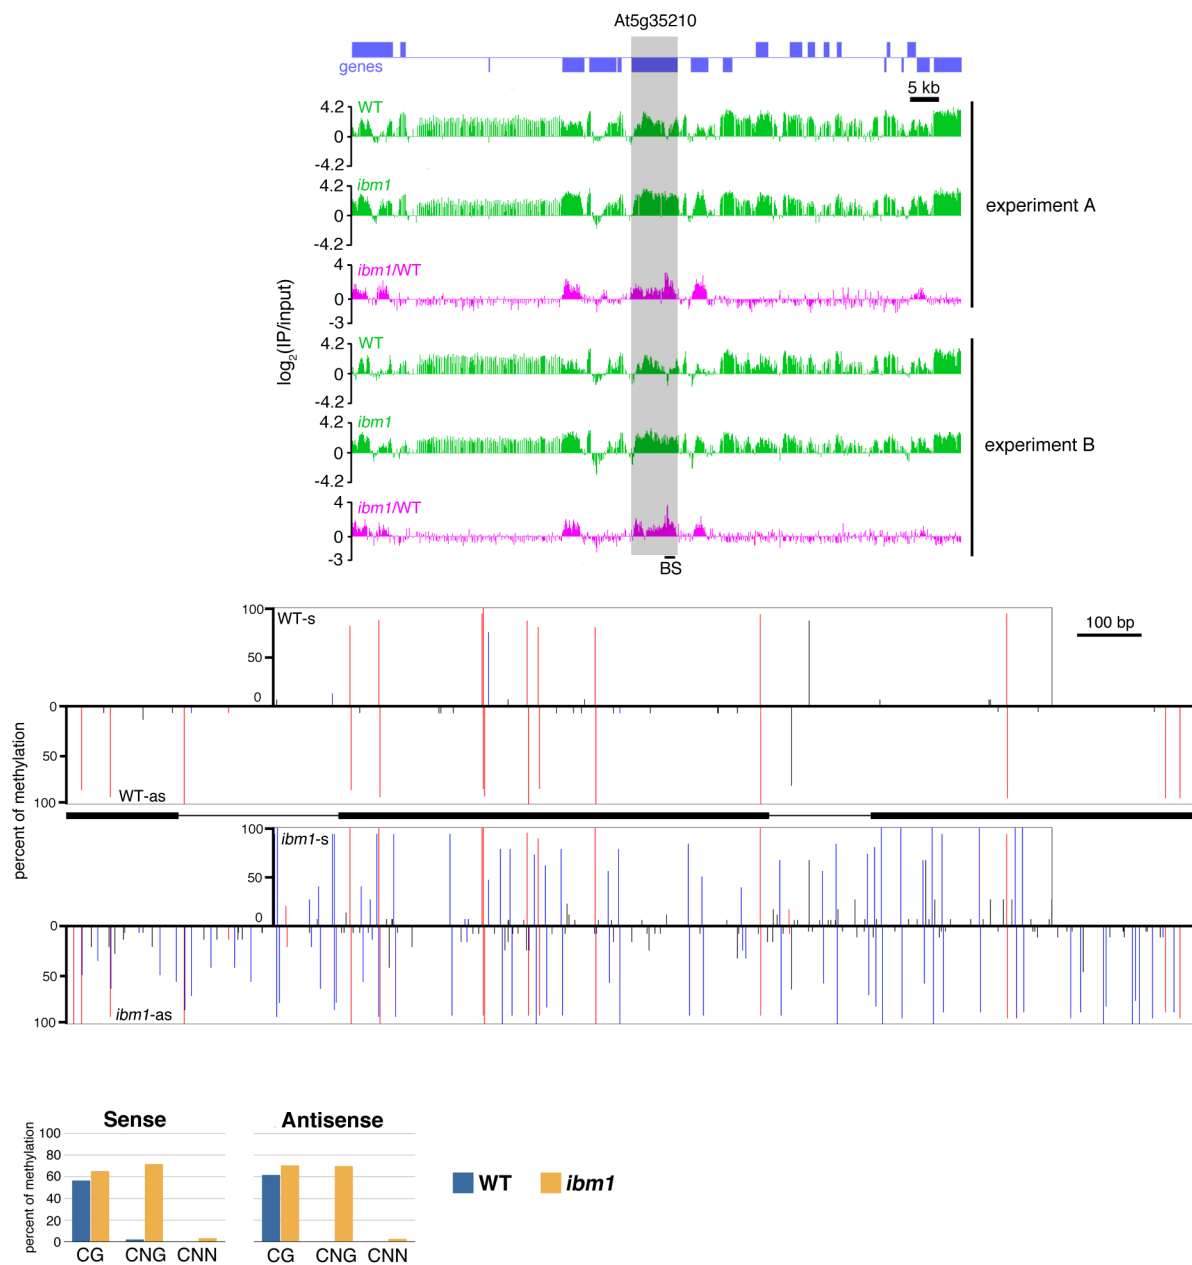

Supplementary Figure S4

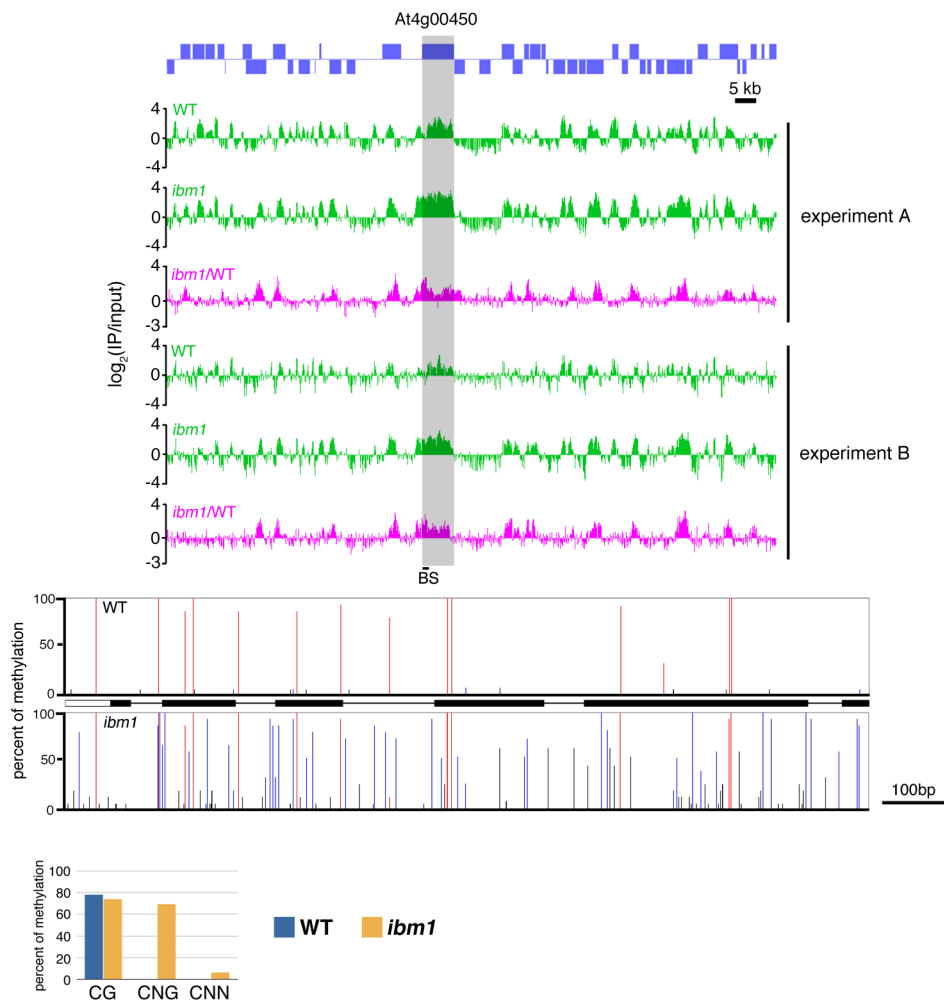

Supplementary Figure S5

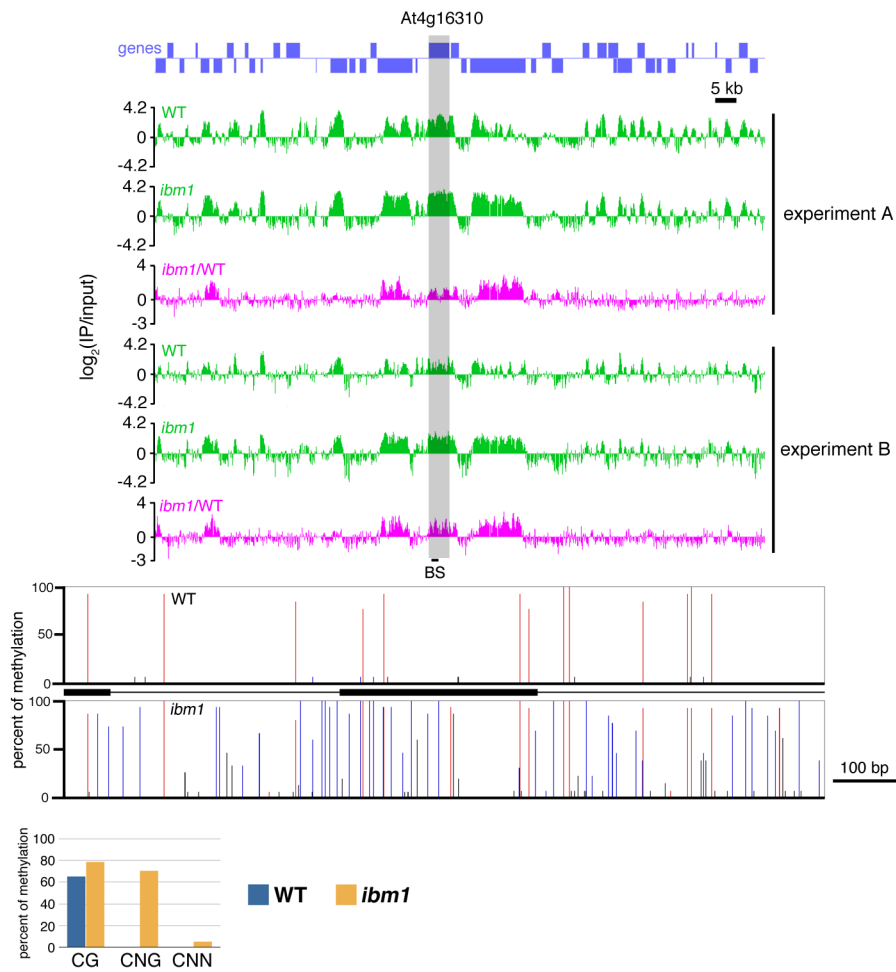

Supplementary Figure S6

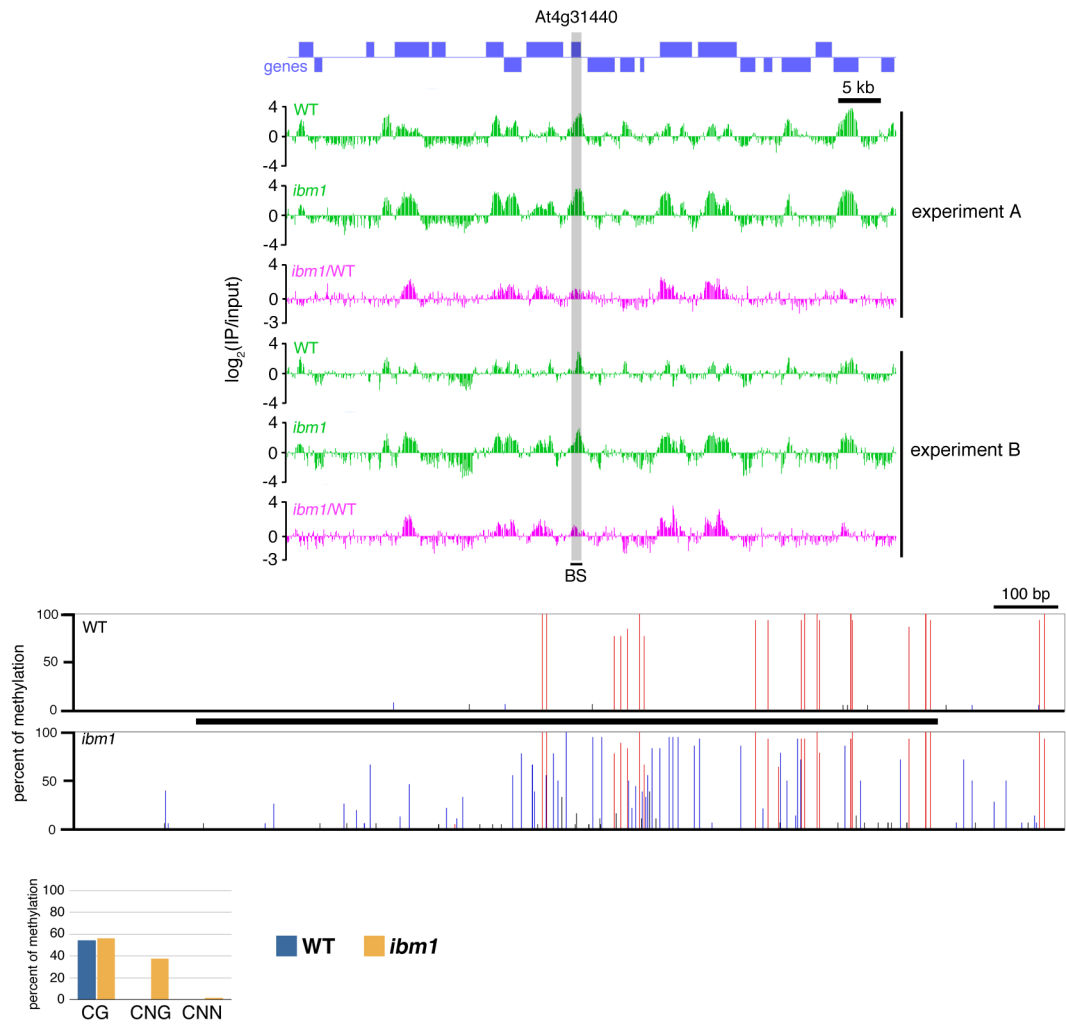

Supplementary Figure S7

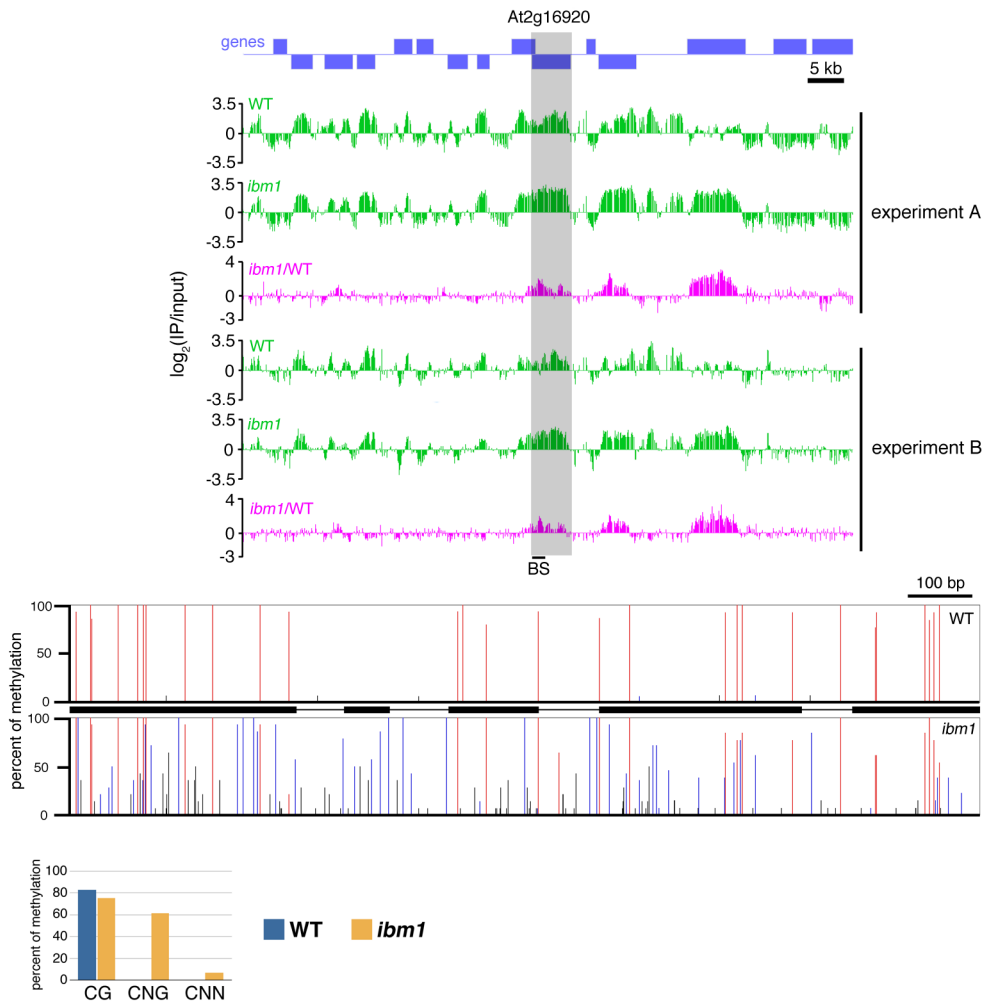

Supplementary Figure S8

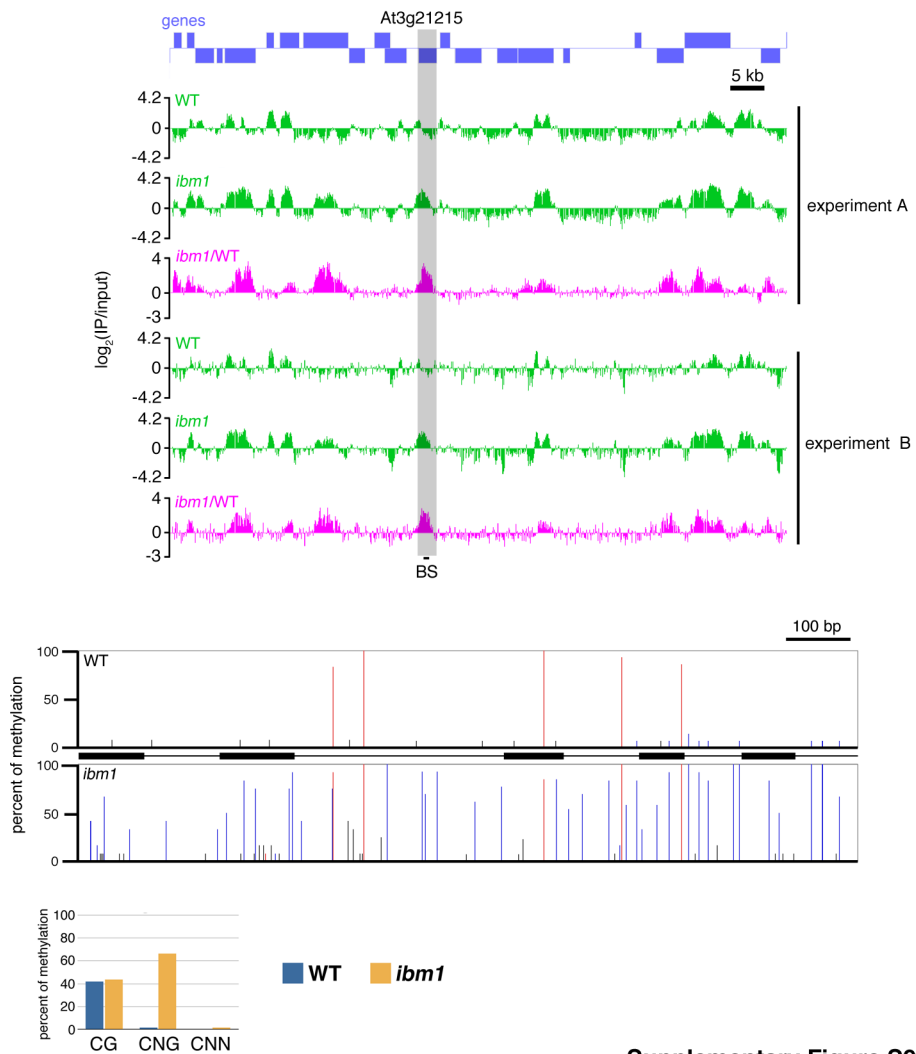

Supplementary Figure S9

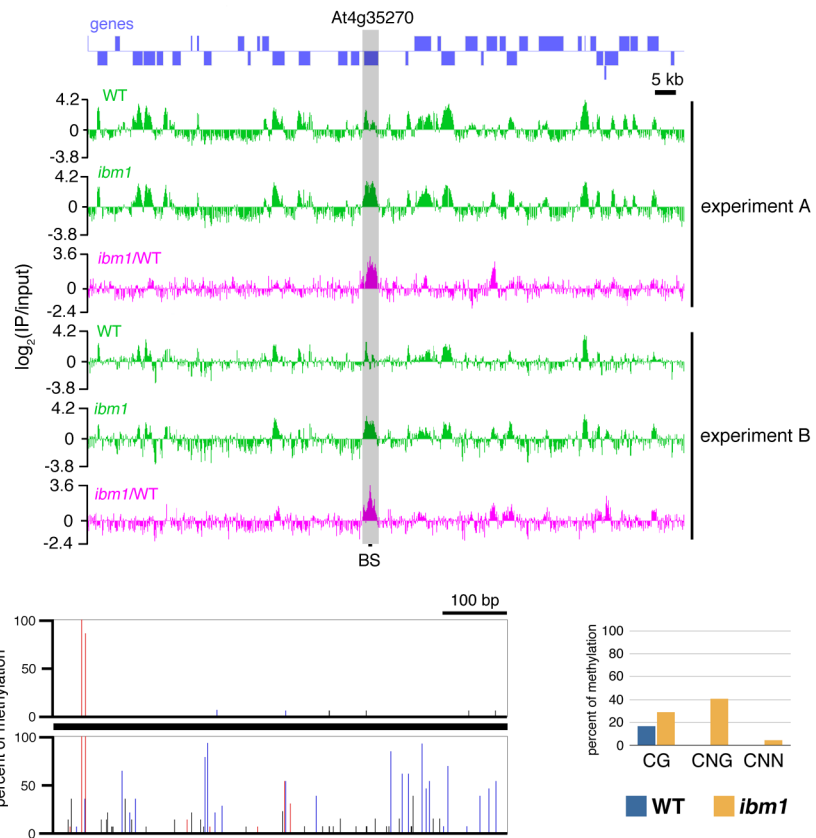

Supplementary Figure S10



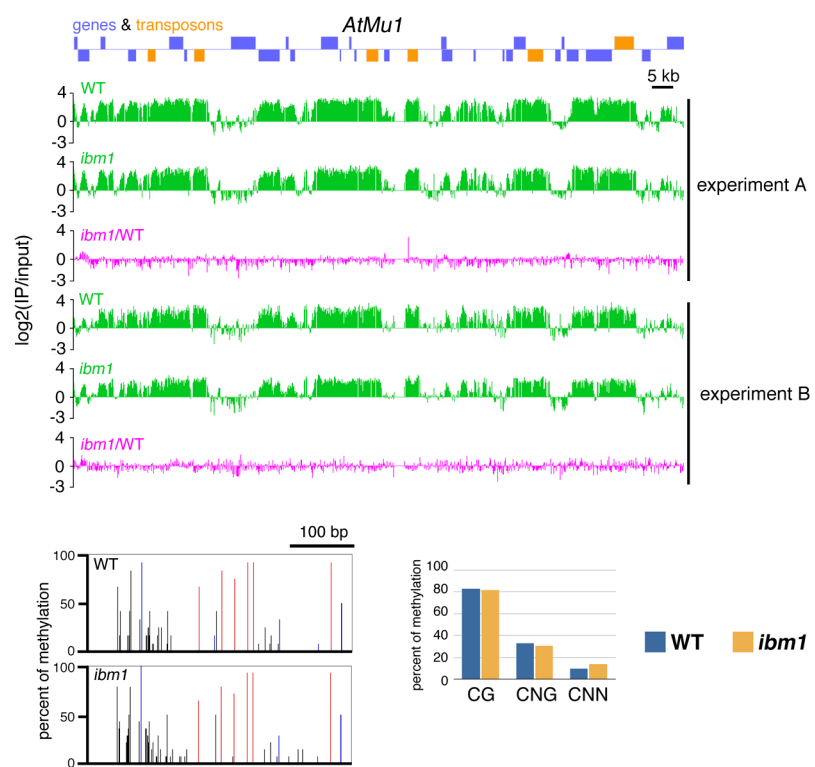

Supplementary Figure S11

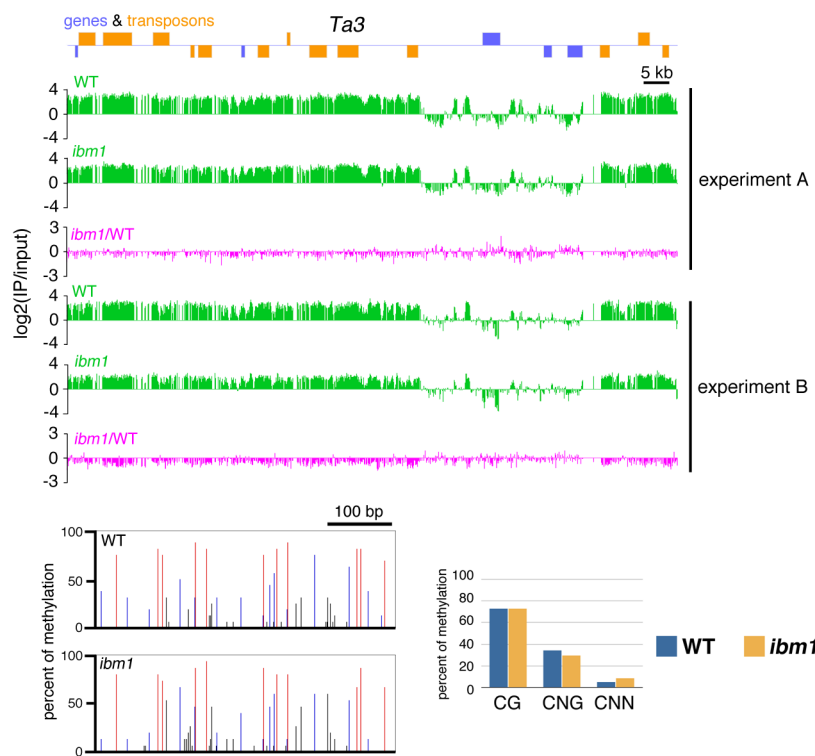

Supplementary Figure S12

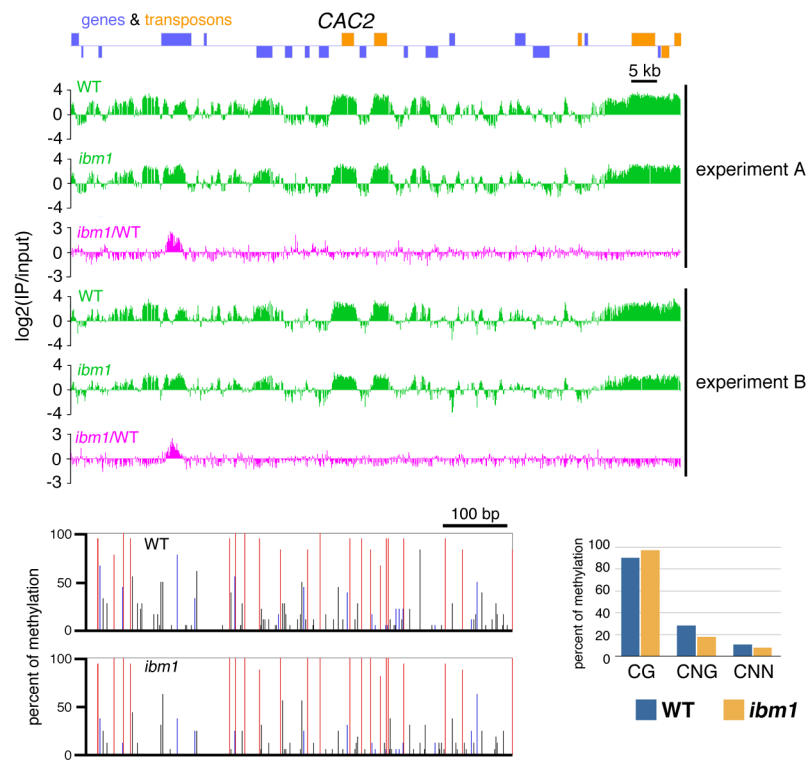

Supplementary Figure S13

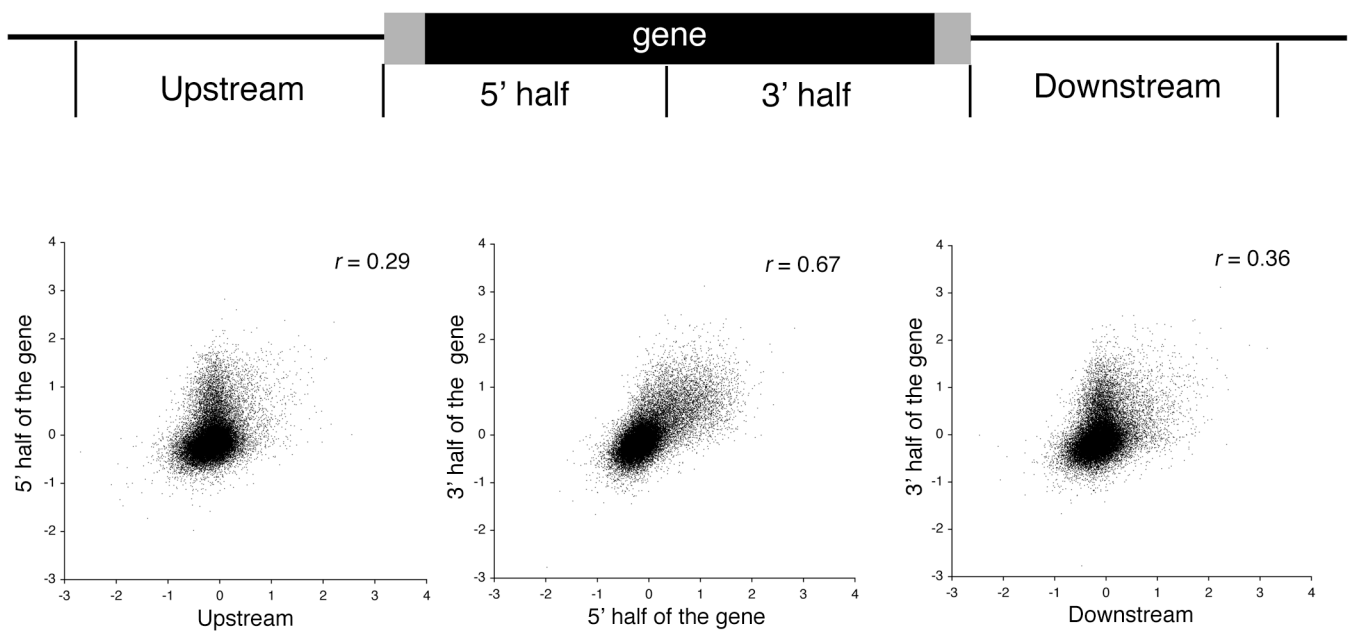

**Supplementary Figure S14** The *ibm1* mutation affects 5' and 3' halves of a gene in a coordinated manner. Each gene was divided into halves and average change in the methylation signal was compared. For controls, the methylation change was also compared to upstream and downstream flanking regions of the same length.

**A**

|           | M    | A    | U     |
|-----------|------|------|-------|
| Class I   | 348  | 165  | 34    |
| Class II  | 1173 | 642  | 217   |
| Class III | 2760 | 4235 | 11651 |

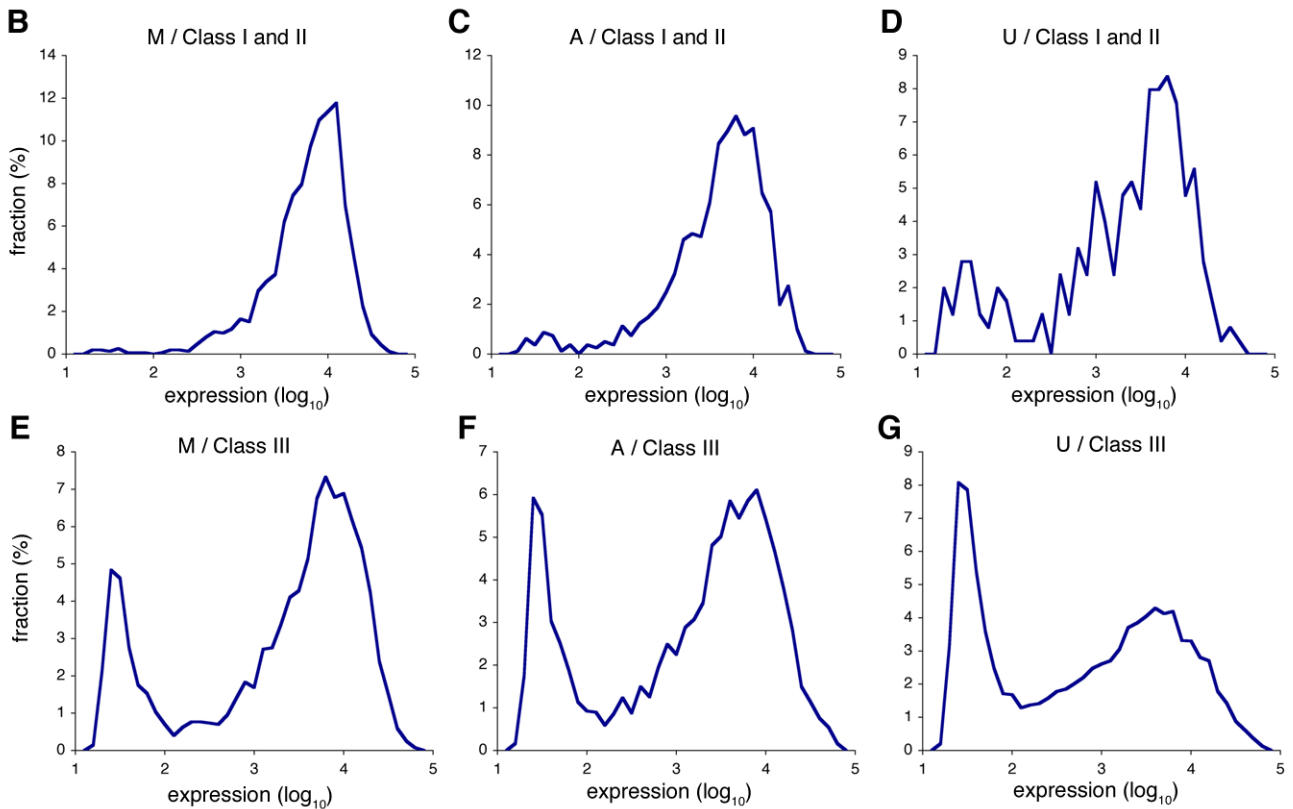

**Supplementary Figure S15** (A) Relationship between DNA methylation in wild type and the response to the *ibm1* mutation. Methylated (M), ambiguous (A), and unmethylated (U) gene groups reflect methylation level in wild type, which are from Zilberman et al. (Nat Genet 39, 61-69). Gene Class I, II, and III are classified by response to the *ibm1* mutation (Supplementary Fig. S1). Gene number is indicated in each group. (B-G) Histograms showing the expression profiles of gene groups defined in a. Class I and II are combined. X-axis indicates  $\log_{10}$  of expression in wild type leaves in our microarray experiment. Class III groups show bipartite pattern of expression, indicating that they include genes with high- and low-expression levels. In Class I and II, proportion of genes with low expression level was reduced. That was also seen in genes not methylated in wild type (A and U).

**A**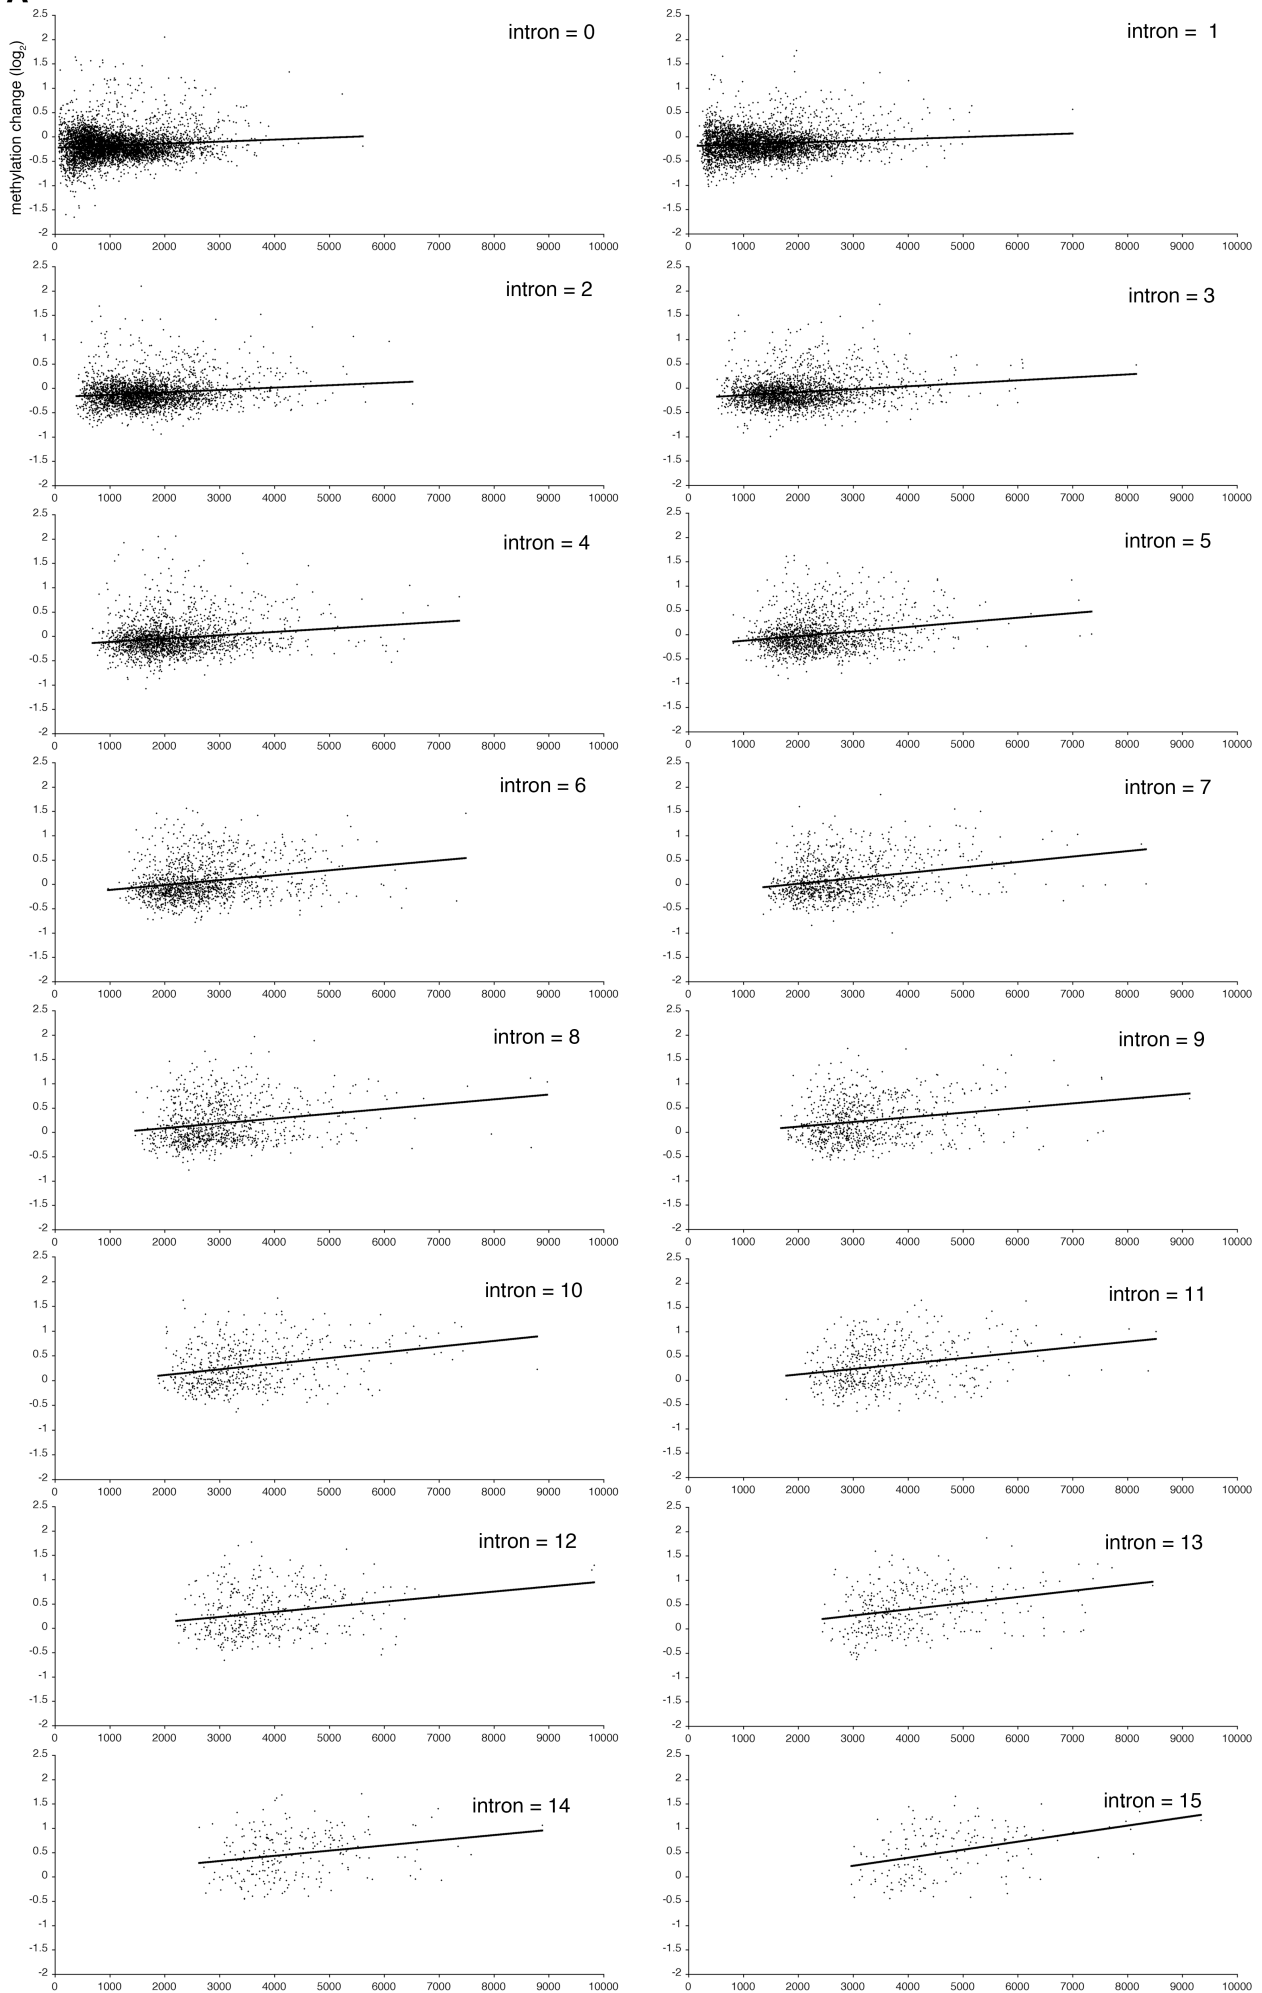**Supplementary Figure S16** (legend in the next page)

**B**

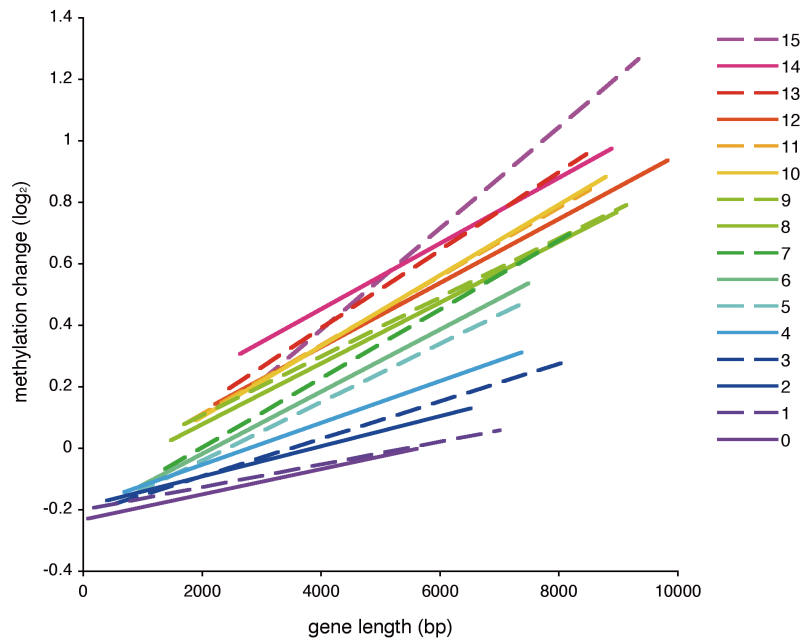

**Supplementary Figure S16** Effect of intron number and gene length on the methylation change in *ibm1*. (A; previous page) Relationship between gene length and the methylation change in *ibm1*. Each graph shows the result of each gene group having the same intron number. The methylation change shows mean of  $\log_2$  (*ibm1*/WT) signals in each gene. Lines were drawn by linear approximation. (B) Superimposed lines from (A). Even within a group of genes with the same intron number, longer gene showed stronger response to *ibm1*.

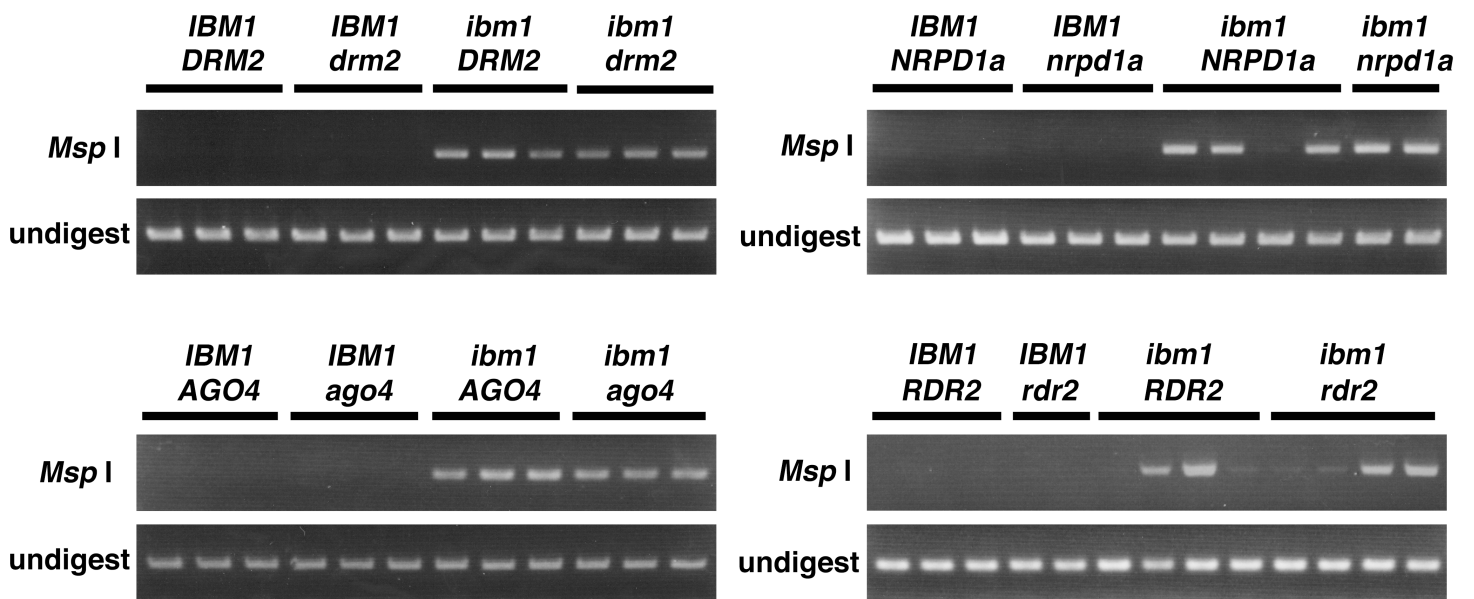

**Supplementary Figure S17** Methylation status of *ERL2* gene (At5g07180) in the double mutants. Genomic DNA used in the experiment in Fig.6 was digested with or without the methylation-sensitive restriction enzyme *Msp* I (CCGG, sensitive to methylation in the first C) and amplified using primer pair 5'-CAGATCATGTAAGGCTTGTCTTATGC-3' + 5'-ACGTACAGATTGGCAAGACTGAAG-3'. Both the *Msp* I-digested and undigested samples were digested with *Dra* I and *Pst* I before the PCR. Although the *ibm1*-induced hypermethylation was less penetrant than that in the *BNS* locus, the double mutants also showed hypermethylation in the *ERL2* gene.



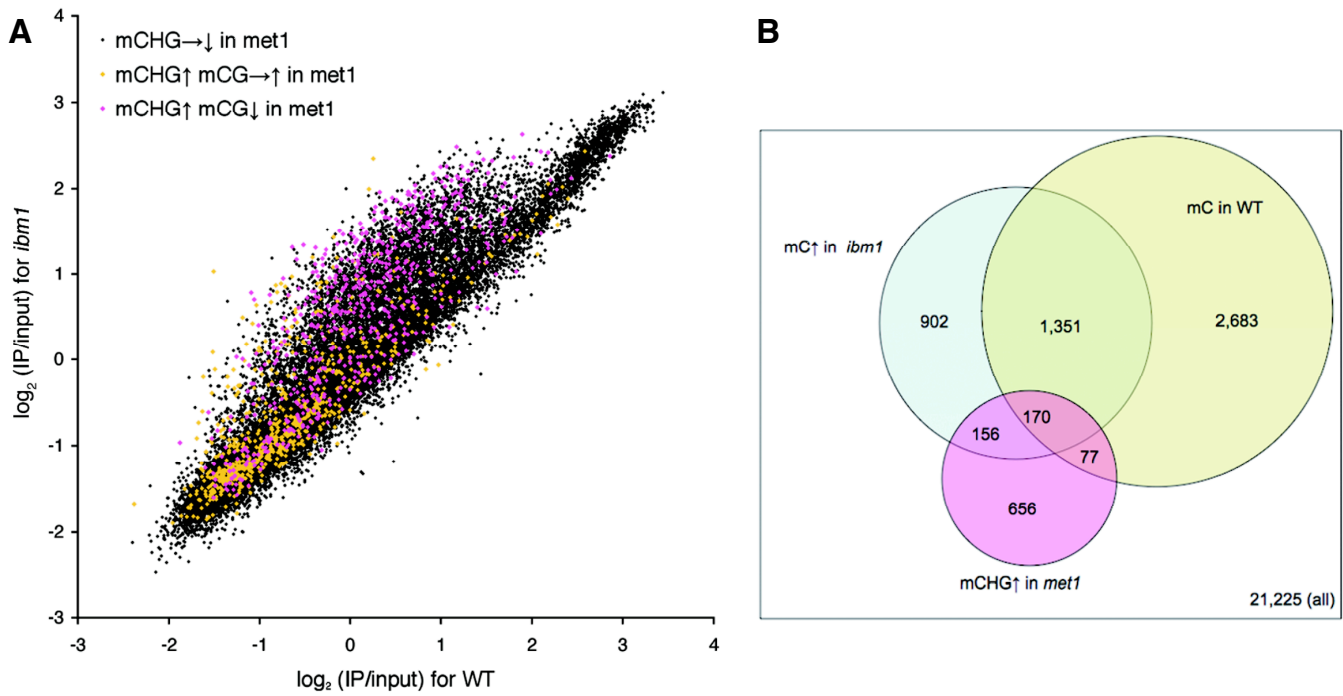

**Supplementary Figure S18** Relationship between the CHG hyper-methylation in *met1* and *ibm1*. (A) Methylation signal for each gene in wild type and *ibm1*. Genes showing increased CHG methylation and decreased CG methylation in *met1* tend to be hyper-methylated in *ibm1* (magenta dots). On the other hand, the response to *ibm1* was not so strong in genes showing increased CHG methylation without decrease in CG methylation in *met1* (yellow dots). (B) Venn diagram showing the relationship between genes methylated in wild type (yellow circle; Zilberman et al. 2006), genes with CHG hyper-methylation in *met1* (red circle; Lister et al. 2008), and genes hyper-methylated in *ibm1* (Blue circle; this work, Class I and Class II genes). Number of genes methylated in wild type and CHG hyper-methylation in *met1* (the overlap between yellow and red circles) was 247. Of the 247 genes, 170 showed hyper-methylation in *ibm1*.
